# Supplementary material for: Bcl-xL is an oncogenic driver in colorectal cancer
Source: PubMed Central journal article supplement (PMC5108319; doi:10.1038/cddis.2016.233), 2016-08-18

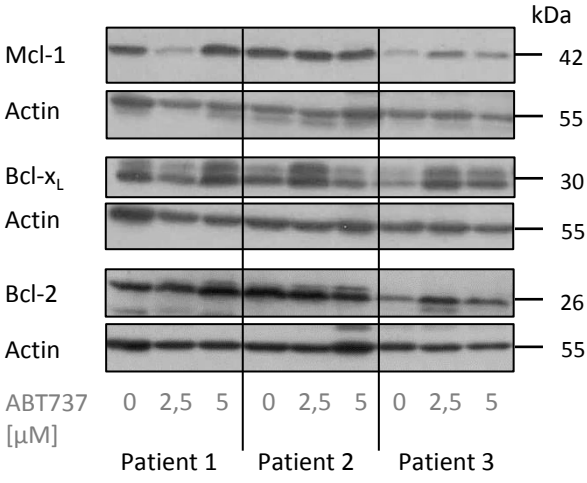

Supplement: cddis2016233x2.pdf [file cddis2016233x2.pdf]
